# Supplementary material for: Spectrum and Prevalence of Pathogenic Variants in Ovarian Cancer Susceptibility Genes in a Group of 333 Patients
Source: PubMed Central journal article supplement (PMC6266089; doi:10.3390/cancers10110442), 2018-11-14
Supplement: cancers-10-00442-s001.pdf [file cancers-10-00442-s001.pdf]

## Supplementary materials: Spectrum and Prevalence of Pathogenic Variants in Ovarian Cancer Susceptibility Genes in a Group of 333 Patients

Magdalena Koczkowska, Natalia Krawczynska, Maciej Stukan, Alina Kuzniacka, Izabela Brozek, Piotr Kozlowski, Marcin Sniadecki, Jaroslaw Debniak, Dariusz Wydra, Wojciech Biernat, Janusz Limon, Bartosz Wasag and Magdalena Ratajska

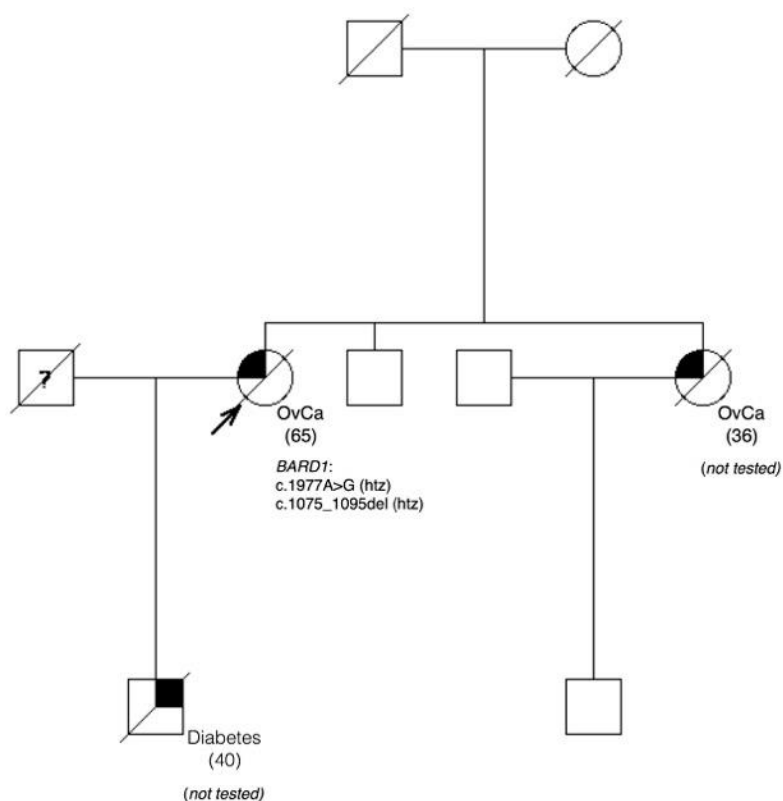

**Figure S1.** Pedigree of the family (M373) with proband being a compound heterozygote for two *BARD1* variants: an in-frame deletion in exon 4, c.1075\_1095del (p.Leu359\_Pro365del) and a silent variant in exon 10, c.1977A>G, resulting in the missplicing, r.159\_1903del (p.Cys53\_Trp635delinsfs\*12). Abbreviations: OvCa—ovarian cancer; “→”—proband; (36)—age at diagnosis; “/”—dead.

In order to determine if identified variants affect *BARD1* in *cis* or *trans*, we conducted RT-PCR experiment using a primer specific for 21bp deletion in exon 4 (c.1075\_1095del) and second, spanning exon 10 and 11 junction. Agarose gel electrophoresis revealed a band of expected fragment size (959bp), presented exclusively in proband’s sample (marked with an arrow) but not in control cDNAs. Consequently, the band was cut from the gel and sequenced. The Sanger sequencing analysis confirmed that variant c.1977A>G resides in *trans* position to c.1075\_1095del.

Sequence of primers used for amplification:

**BARD1\_Δ21bp\_cDNA\_frw:** 5'-CCTCAGAAAATATACCACCTTCA-3'

**BARD1\_ex10/11\_cDNA\_rev:** 5'-ATCAAACAGCTTTGGCAACAGC-3'

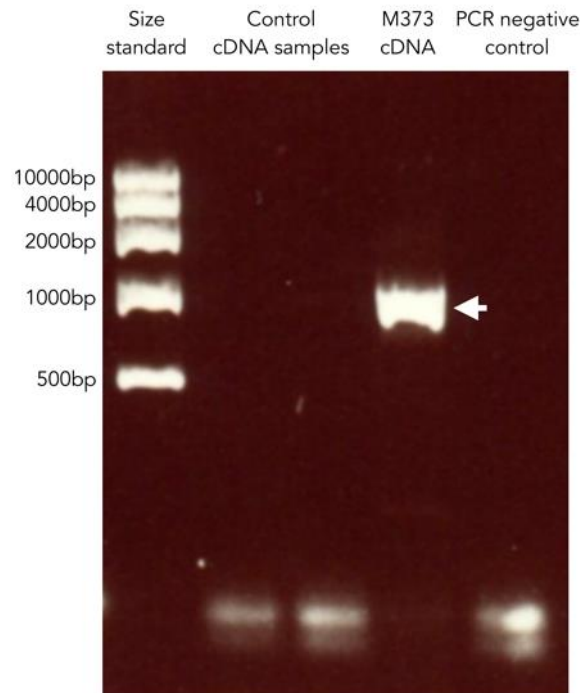

**Figure S2.** Analysis result for variants: c.1075\_1095del and c.1977A>G.

**Table S1.** Variants of uncertain significance (VUS) identified in the studied cohort of 333 unselected ovarian cancer individuals.

| No.                                 | Exon / Intron | Variant in corresponding cDNA | Predicted amino acid sequence | Variant type | dbSNP ID <sup>1</sup> | ACMG criteria <sup>2</sup>      |
|-------------------------------------|---------------|-------------------------------|-------------------------------|--------------|-----------------------|---------------------------------|
| <b>ATM (NM_000051.3, LRG_135t1)</b> |               |                               |                               |              |                       |                                 |
| 1                                   | 8             | c.1066-6T>G                   | p.(?)                         | NS           | rs201686625           | PM2                             |
| 2                                   | 9             | c.1229T>C                     | p.(Val410Ala)                 | M            | rs56128736            | PP3+BP6                         |
| 3                                   | 9             | c.1792A>C                     | p.(Ile598Leu)                 | M            | rs56128736            | PP3+BP6                         |
| 4                                   | 11            | c.1802+4A>G                   | p.(?)                         | NS           | ND                    | PM2                             |
| 5                                   | 22            | c.3160C>T                     | p.(Pro1054Ser)                | M            | rs775095314           | PM2+PP3                         |
| 6                                   | 23            | c.3402+32_3402+34del          | p.(?)                         | NS           | rs545376366           | No rules have met the criteria. |
| 7                                   | 23            | c.3403-34T>A                  | p.(?)                         | NS           | rs148368017           | No rules have met the criteria. |
| 8                                   | 28            | c.4148C>T                     | p.(Ser1383Leu)                | M            | rs141087784           | PM2+PP3                         |
| 9                                   | 29            | c.4258C>T                     | p.(Leu1420Phe)                | M            | rs1800058             | PM5+BP6                         |
| 10                                  | 30            | c.4600G>A                     | p.(Val1534Ile)                | M            | rs745351684           | PM2+BP4                         |
| 11                                  | 34            | c.5178-7T>C                   | p.(?)                         | NS           | ND                    | PM2+BP6                         |
| 12                                  | 37            | c.5558A>T                     | p.(Asp1853Val)                | M            | rs1801673             | PP3+BP6                         |
| 13                                  | 37            | c.5674+102A>G                 | p.(?)                         | NS           | rs4988045             | BP4                             |
| 14                                  | 39            | c.5918+72A>G                  | p.(?)                         | NS           | rs3218694             | No rules have met the criteria. |
| 15                                  | 43            | c.6348-54T>C                  | p.(?)                         | NS           | rs116924981           | BP4                             |
| 16                                  | 50            | c.7475T>G                     | p.(Leu2492Arg)                | M            | rs56399857            | PM1+PP3+BP6                     |
| 17                                  | 51            | c.7629+107T>A                 | p.(?)                         | NS           | ND                    | PM2                             |
| 18                                  | 53            | c.7818A>G                     | p.(Ile2606Met)                | M            | rs1027959208          | PM2+BP4                         |
| 19                                  | 57            | c.8396T>A                     | p.(Phe2799Tyr)                | M            | ND                    | PM2+BP4                         |
| 20                                  | 63            | c.9104T>C                     | p.(Leu3035Pro)                | M            | rs1272213516          | PM1+PM2+PP3                     |
| <b>BARD1 (NM_000465.3)</b>          |               |                               |                               |              |                       |                                 |
| 1                                   | 1             | c.159-261T>G                  | p.(?)                         | NS           | rs75146556            | PP3+BS1                         |

| No.                                   | Exon / Intron | Variant in corresponding cDNA  | Predicted amino acid sequence   | Variant type | dbSNP ID <sup>1</sup> | ACMG criteria <sup>2</sup>      |
|---------------------------------------|---------------|--------------------------------|---------------------------------|--------------|-----------------------|---------------------------------|
| 2                                     | 4             | c.760A>C                       | p.(Ile254Leu)                   | M            | rs879253984           | PM2+PP3+BP4                     |
| 3                                     | 4             | c.1075_1095del                 | p.(Leu359_Pro365del)            | D            | rs28997575            | PM4+PP3+BS1+BP6                 |
| 4                                     | 4             | c.1177G>A                      | p.(Gly393Ser)                   | M            | ND                    | PM2+PP3+BP4                     |
| 5                                     | 8             | c.1811-77A>G                   | p.(?)                           | NS           | rs76486825            | BP4                             |
| 6                                     | 10            | c.1977A>G<br>r.[=,159_1903del] | p.(Cys53_Trp635delins<br>fs*12) | S            | rs147215925           | PS3+PP3+PP5+BP6                 |
| 7                                     | 11            | c.2251C>T                      | p.(Arg751Trp)                   | M            | rs139785364           | PM2+PP3                         |
| 8                                     | 11            | c.2282G>A                      | p.(Ser761Asn)                   | M            | rs142155101           | PP3+BP4                         |
| <b>BRIP1 (NM_032043.2; LRG_300t1)</b> |               |                                |                                 |              |                       |                                 |
| 1                                     | 3             | c.205+20C>A                    | p.(?)                           | NS           | ND                    | PM2+BP4                         |
| 2                                     | 11            | c.1622A>G                      | p.(Asn541Ser)                   | M            | ND                    | PM2+PP3+BP1                     |
| 3                                     | 13            | c.1883G>A                      | p.(Gly628Asp)                   | M            | ND                    | PM2+PP3+BP1+BP4                 |
| 4                                     | 19            | c.2845C>A                      | p.(Pro949Thr)                   | M            | ND                    | PM2+PP3+BP1+BP4                 |
| <b>CDH1 (NM_004360.3; LRG_301t1)</b>  |               |                                |                                 |              |                       |                                 |
| 1                                     | 2             | c.163+65G>T                    | p.(?)                           | NS           | ND                    | PM2+PP3+BP1                     |
| 2                                     | 2             | c.164-8C>T                     | p.(?)                           | NS           | ND                    | PM2+PP3+BP1+BP4                 |
| 3                                     | 3             | c.194G>T                       | p.(Arg65Met)                    | M            | ND                    | PM2+PP3+BP1+BP4                 |
| 4                                     | 5             | c.687+66A>C                    | p.(?)                           | NS           | ND                    | PM2+PP3+BP1                     |
| 5                                     | 7             | c.836C>T                       | p.(Thr279Ile)                   | M            | rs761269950           | PP3+BP1                         |
| 6                                     | 11            | c.1711+120G>A                  | p.(?)                           | NS           | rs535005673           | BP1+BP4                         |
| 7                                     | 15            | c.2439+6T>C                    | p.(?)                           | NS           | ND                    | PM2+PP3+BP1                     |
| <b>CHEK2 (NM_007194.3)</b>            |               |                                |                                 |              |                       |                                 |
| 1                                     | 4             | c.470T>C                       | p.(Ile157Thr)                   | M            | rs17879961            | PM1+PP3+PP5+BS1+BP6             |
| 2                                     | 4             | c.507T>A                       | p.(Phe169Leu)                   | M            | ND                    | PM2+PP3+BP4                     |
| 3                                     | 11            | c.1216C>T                      | p.(Arg406Cys)                   | M            | rs587782527           | PM1+PP3+BP4                     |
| 4                                     | 15            | c.1603C>T                      | p.(Arg535Cys)                   | M            | rs576248104           | PM2+ PP3+BP4                    |
| 5                                     | 3'UTR         | c.*6G>A                        | p.(?)                           | NS           | rs775315910           | PM2+PP3+BP6 <sup>3</sup>        |
| <b>MRE11A (NM_005591.3)</b>           |               |                                |                                 |              |                       |                                 |
| 1                                     | 4             | c.315-35C>T                    | p.(?)                           | NS           | rs201686625           | PM2                             |
| 2                                     | 6             | c.426C>T                       | p.(Asp142=)                     | NS           | rs56128736            | PP3+BP6                         |
| 3                                     | 8             | c.822T>C                       | p.(Leu274=)                     | NS           | rs56128736            | PP3+BP6                         |
| 4                                     | 9             | c.862C>T                       | p.(Arg288Cys)                   | M            | ND                    | PM2                             |
| 5                                     | 12            | c.1327-11G>A                   | p.(?)                           | NS           | rs775095314           | PM2+PP3                         |
| 6                                     | 13            | c.1332G>A                      | p.(Val444=)                     | NS           | rs545376366           | No rules have met the criteria. |
| 7                                     | 13            | c.1475C>A                      | p.(Ala492Asp)                   | NS           | rs148368017           | No rules have met the criteria. |
| 8                                     | 13            | c.1480G>A                      | p.(Glu494Lys)                   | M            | rs141087784           | PM2+PP3                         |
| 9                                     | 16            | c.1868-148G>T                  | p.(?)                           | M            | rs1800058             | PM5+BP6                         |
| 10                                    | 18            | c.1995-94G>A                   | p.(?)                           | M            | rs745351684           | PM2+BP4                         |
| <b>MSH2 (NM_000251.2; LRG_218t1)</b>  |               |                                |                                 |              |                       |                                 |
| 1                                     | 6             | c.956A>G                       | p.(Asp319Gly)                   | M            | rs786204185           | PM1+PM2+PP3                     |
| 2                                     | 8             | c.1378A>G                      | p.(Met460Val)                   | M            | rs575905950           | PM1+PM2+PP3+BP4                 |
| <b>NBN (NM_002485.4; LRG_158t1)</b>   |               |                                |                                 |              |                       |                                 |
| 1                                     | 1             | c.38-3C>T                      | p.(?)                           | NS           | ND                    | PM2+PP3+BP4                     |
| 2                                     | 2             | c.38G>A                        | p.(Gly13Glu)                    | M            | ND                    | PM2+PP3                         |
| 3                                     | 4             | c.361G>A                       | p.(Asp121Asn)                   | M            | ND                    | PP3+BP4+PM2                     |
| 4                                     | 4             | c.481-168C>T                   | p.(?)                           | NS           | rs104895037           | BP4                             |
| 5                                     | 5             | c.511A>G                       | p.(Ile171Val)                   | M            | rs61754966            | PP3                             |
| 6                                     | 6             | c.703-29C>T                    | p.(?)                           | NS           | rs104895034           | BP4                             |
| 7                                     | 7             | c.897-42G>C                    | p.(?)                           | NS           | rs141172426           | BP4                             |
| 8                                     | 14            | c.2185-264G>A                  | p.(?)                           | NS           | rs543500604           | BP4                             |
| <b>PALB2 (NM_024675; LRG_308t1)</b>   |               |                                |                                 |              |                       |                                 |

| No.                                    | Exon / Intron | Variant in corresponding cDNA | Predicted amino acid sequence | Variant type | dbSNP ID <sup>1</sup> | ACMG criteria <sup>2</sup> |
|----------------------------------------|---------------|-------------------------------|-------------------------------|--------------|-----------------------|----------------------------|
| 1                                      | 1             | c.18G>T                       | p.(Gly6=)                     | NS           | rs587782462           | PM2+BP7                    |
| 2                                      | 4             | c.756T>A                      | p.(Thr252=)                   | NS           | ND                    | PM1+PM2+BP7                |
| 3                                      | 5             | c.2514+21G>T                  | p.(?)                         | NS           | ND                    | PM2                        |
| <b>RAD50 (NM_005732.3)</b>             |               |                               |                               |              |                       |                            |
| 1                                      | 1             | c.122G>A                      | p.(Gly41Glu)                  | M            | rs1473775948          | PP3+BP1                    |
| 2                                      | 8             | c.1094G>A                     | p.(Arg365Gln)                 | M            | rs146370443           | BP1                        |
| 3                                      | 9             | c.1277A>G                     | p.(Gln426Arg)                 | M            | rs145428112           | BP1                        |
| 4                                      | 9             | c.1336A>G                     | p.(Lys446Glu)                 | M            | rs149217423           | PP3+BP4+BP1                |
| 5                                      | 11            | c.1766A>G                     | p.(Gln589Arg)                 | M            | rs1338200174          | BP1                        |
| <b>RAD51 (NM_002875.4)</b>             |               |                               |                               |              |                       |                            |
| 1                                      | 5             | c.419T>C                      | p.Leu140Pro                   | M            | ND                    | PP3                        |
| <b>RAD51B (NM_133509.3)</b>            |               |                               |                               |              |                       |                            |
| 1                                      | 3             | c.199-5T>G                    | p.(?)                         | NS           | ND                    | PM2+BM4                    |
| 2                                      | 7             | c.756+118T>A                  | p.(?)                         | NS           | ND                    | BP4                        |
| 3                                      | 8             | c.853+172T>C                  | p.(?)                         | NS           | rs192016240           | BP4                        |
| 4                                      | 9             | c.957+16G>A                   | p.(?)                         | NS           | ND                    | PM2                        |
| <b>RAD51C (NM_058216.2; LRG_314t1)</b> |               |                               |                               |              |                       |                            |
| 1                                      | 2             | c.376G>A                      | p.(Ala126Thr)                 | M            | rs61758784            | PM1+BP6                    |
| 2                                      | 3             | c.572-17G>T                   | p.(?)                         | NS           | rs193023469           | BP6                        |
| 3                                      | 5             | c.790G>A                      | p.(Gly264Ser)                 | M            | rs147241704           | BP6                        |
| <b>RAD51D (NM_002878.3; LRG_516t1)</b> |               |                               |                               |              |                       |                            |
| 1                                      | 9             | c.812T>C                      | p.Val271Ala                   | M            | ND                    | PP3+PM2                    |
| <b>STK11 (NM_000455.4; LRG_319t1)</b>  |               |                               |                               |              |                       |                            |
| 1                                      | 5'UTR         | c.-117dup                     | p.(?)                         | NS           | ND                    | PM2                        |
| <b>TP53 (NM_000546.5; LRG_321t1)</b>   |               |                               |                               |              |                       |                            |
| 1                                      | 9             | c.949C>A                      | p.(Gln317Lys)                 | M            | rs764735889           | PM1+BP4                    |
| 2                                      | 10            | c.1101-49C>T                  | p.(?)                         | NS           | rs17881850            | BP4                        |

<sup>1</sup> RS number based on the dbSNP Database (<https://www.ncbi.nlm.nih.gov/projects/SNP/>) (as of September 2018); <sup>2</sup> Interpretation of variants pathogenicity based on the American the College of Medical Genetics and Genomics (ACMG) recommendations [1]; <sup>3</sup> Variant c.\*6G>A in the *CHEK2* gene potentially affect miRs binding sequence. Abbreviations – M: missense; S: splicing; D: in-frame deletion; NS: not specified.

## References

1. Richards, S.; Aziz, N.; Bale, S.; et al. Standards and guidelines for the interpretation of sequence variants: a joint consensus recommendation of the American College of Medical Genetics and Genomics and the Association for Molecular Pathology. *Genet. Med.* **2015**, *17*, 405–424.
